# Supplementary material for: Knowledge of Stakeholders in the Livestock Industries of East and Southeast Asia about Welfare during Transport and Slaughter and Its Relation to Their Attitudes to Improving Animal Welfare
Source: Animals (Basel). 2019 Mar 19;9(3):99. doi: 10.3390/ani9030099 (PMC6466319; doi:10.3390/ani9030099)
Supplement: Supplementary file 1 [file animals-09-00099-s001.pdf]

## The questionnaire

### Section 1

The purpose of this section is to find out about how effective the current roadshow presentations will increase the level of knowledge and understanding of OIE standards regarding the welfare of livestock in South East Asian countries. This section will focus on your Knowledge on animal production systems in particular during Slaughter and Transport.

Your responses will only be identifiable to you by coding. Please feel free to decline to answer any of the questions at any time or to withdraw from the survey. The answers will be coded by a unique number given to individual participants ending with “B” or “A” which stand for before and after the training takes place.

Descriptive statistics are provided for each husbandry knowledge question in the stakeholders workshops. Correct answers are indicated in bold.  $X_1$  = mean husbandry knowledge scores before training in %,  $X_2$  = mean husbandry knowledge scores after training in %, D = mean difference of husbandry knowledge scores after training, in %).

|    | Question                                                                                                                                                                                                                                                                                                                                                                                                                                                                                                                                                                                                                                                                                                                              | $X_1\%$ | $X_2\%$ | D%    |
|----|---------------------------------------------------------------------------------------------------------------------------------------------------------------------------------------------------------------------------------------------------------------------------------------------------------------------------------------------------------------------------------------------------------------------------------------------------------------------------------------------------------------------------------------------------------------------------------------------------------------------------------------------------------------------------------------------------------------------------------------|---------|---------|-------|
| Q1 | When taking a laying hen out of a multiple bird cage: <ul style="list-style-type: none"><li>• hold bird firmly by the neck and tail and remove from cage slowly with bird facing towards the door</li><li>• grasp bird by one leg and the comb and remove from cage slowly with bird facing backwards</li><li>• grasp bird by shanks of both legs with one hand and support breast with other hand. Flip onto back before withdrawing from cage with head towards the door</li><li>• <b>grasp shanks of both legs with one hand and support breast with other hand. Withdraw slowly from cage with bird facing backwards</b></li><li>• grasp right wing and left leg and remove slowly from cage with bird facing backwards</li></ul> | 27.9    | 65.2    | +37.3 |
| Q2 | Is it normal practice in your country for livestock to be rendered unconscious (stunned) before being killed? <ul style="list-style-type: none"><li>• yes</li><li>• no/don't know</li></ul>                                                                                                                                                                                                                                                                                                                                                                                                                                                                                                                                           | 26.5    | 35.0    | +8.5  |
| Q3 | The organisation that sets international standards for livestock transport and slaughter is: <ul style="list-style-type: none"><li>• Royal Society for Prevention of Cruelty to Animals (RSPCA)</li><li>• World Animal Protection</li><li>• <b>World Animal Health Organisation (OIE)</b></li><li>• World Society for Protection of Animals (WSPA)</li><li>• Food and Agriculture Organisation of the United Nations (FAO)</li></ul>                                                                                                                                                                                                                                                                                                  | 32.4    | 77.7    | +45.3 |
| Q4 | Pigs are prone to heat stress during transport; they naturally avoid heat stress by: <ul style="list-style-type: none"><li>• panting</li><li>• dust bathing</li><li>• <b>wallowing</b></li></ul>                                                                                                                                                                                                                                                                                                                                                                                                                                                                                                                                      | 20.9    | 44.9    | +24.0 |

|     |                                                                                                                                                                                                                                                                                                                                                                                                                                                                           |      |      |       |
|-----|---------------------------------------------------------------------------------------------------------------------------------------------------------------------------------------------------------------------------------------------------------------------------------------------------------------------------------------------------------------------------------------------------------------------------------------------------------------------------|------|------|-------|
|     | <ul style="list-style-type: none"> <li>• huddling</li> <li>• burrowing</li> </ul>                                                                                                                                                                                                                                                                                                                                                                                         |      |      |       |
| Q5  | <p>Which of the following gases can cause problems in transport, especially in ships that are inadequately ventilated?</p> <ul style="list-style-type: none"> <li>• <b>ammonia</b></li> <li>• carbon dioxide</li> <li>• carbon monoxide</li> <li>• hydrogen sulphide</li> <li>• all of the above</li> </ul>                                                                                                                                                               | 17.0 | 61.3 | +44.3 |
| Q6  | <p>Which of the following is incorrect in relation to handling races for cattle?</p> <ul style="list-style-type: none"> <li>• <b>curved races are more likely to make cattle baulk compared with straight ones</b></li> <li>• narrow shafts of light make cattle stop moving</li> <li>• they should be wide enough to allow the animal to move freely but not turn around</li> <li>• a solid side facilitates movement</li> <li>• the floor should be non-slip</li> </ul> | 13.9 | 44.4 | +30.5 |
| Q7  | <p>What is the maximum angle of a loading ramp into a vehicle or ship?</p> <ul style="list-style-type: none"> <li>• 10°</li> <li>• <b>20°</b></li> <li>• 25°</li> <li>• 30°</li> <li>• 35°</li> </ul>                                                                                                                                                                                                                                                                     | 15.2 | 59.2 | +44.0 |
| Q8  | <p>When selecting cattle for slaughter using teeth eruption for ageing cattle, which of the following statements is correct?</p> <ul style="list-style-type: none"> <li>• six permanent incisors erupt at 30–42 months</li> <li>• six permanent incisors erupt at 12–24 months</li> <li>• six permanent incisors erupt at 24–36 months</li> <li>• <b>six permanent incisors erupt at 40 months</b></li> <li>• none of the above</li> </ul>                                | 7.6  | 49.1 | +41.5 |
| Q9  | <p>By using a body condition score to select animals for slaughter we are describing which of the following:</p> <ul style="list-style-type: none"> <li>• the immediate health status of livestock</li> <li>• the amount of fat tissue in livestock</li> <li>• <b>the amount of fat and muscle tissue in livestock</b></li> <li>• the level of contents of the digestive tract in livestock</li> <li>• the amount of muscle tissue</li> </ul>                             | 23.9 | 54.0 | +30.1 |
| Q10 | <p>To move pigs effectively, the best method to use is:</p> <ul style="list-style-type: none"> <li>• a collar around the neck with a leash</li> </ul>                                                                                                                                                                                                                                                                                                                     | 34.7 | 88.5 | +53.8 |

|     |                                                                                                                                                                                                                                                                                                                                                                     |      |      |       |
|-----|---------------------------------------------------------------------------------------------------------------------------------------------------------------------------------------------------------------------------------------------------------------------------------------------------------------------------------------------------------------------|------|------|-------|
|     | <ul style="list-style-type: none"> <li>• a halter around the head .....</li> <li>• <b>a pig board to block the pigs and a paddle to guide them in the desired direction</b></li> <li>• a whip</li> <li>• a cattle prod</li> </ul>                                                                                                                                   |      |      |       |
| Q11 | <p>When selecting sheep for slaughter by looking at their teeth, what is the approximate age of a sheep with two permanent incisor teeth?</p> <ul style="list-style-type: none"> <li>• 6 months</li> <li>• <b>12 months to 18 months</b></li> <li>• 2 years</li> <li>• 3 years</li> <li>• 4 years</li> </ul>                                                        | 29.0 | 54.0 | +25.0 |
| Q12 | <p>Which one of the following is not a result of spending time off food and water during transport?</p> <ul style="list-style-type: none"> <li>• hunger</li> <li>• reduction in rumen microbial activity</li> <li>• potential increase in enteropathogenic bacteria</li> <li>• mobilising energy from fat stores</li> <li>• <b>weight gain of 10–15%</b></li> </ul> | 36.4 | 74.1 | +37.7 |
| Q13 | <p>Which one of the following is not a means of determining how many animals to put on a truck?</p> <ul style="list-style-type: none"> <li>• weight of the animal</li> <li>• fleece length in sheep</li> <li>• the animals' pregnancy status</li> <li>• <b>length of the journey</b></li> <li>• whether the animal have horns or not</li> </ul>                     | 14.6 | 49.6 | +35.0 |
| Q14 | <p>For cattle and sheep, heat stress occurs above what temperature?</p> <ul style="list-style-type: none"> <li>• 15–19 °C</li> <li>• 20–25 °C</li> <li>• <b>26–30 °C</b></li> <li>• 31–35 °C</li> <li>• 36 °C</li> </ul>                                                                                                                                            | 14.7 | 52.3 | +37.6 |
| Q15 | <p>Which of the following is not a result of stress in animals before slaughter?</p> <ul style="list-style-type: none"> <li>• bruising</li> <li>• bone breakage</li> <li>• <b>loss of carcass weight</b></li> <li>• pale soft exudative (PSE) meat</li> <li>• dark firm dry (DFD) meat</li> </ul>                                                                   | 19.3 | 50.0 | +30.7 |

|     |                                                                                                                                                                                                                                                                                                                                                                                                  |      |      |       |
|-----|--------------------------------------------------------------------------------------------------------------------------------------------------------------------------------------------------------------------------------------------------------------------------------------------------------------------------------------------------------------------------------------------------|------|------|-------|
|     |                                                                                                                                                                                                                                                                                                                                                                                                  |      |      |       |
| Q16 | <p>Cattle droving: when taking cattle to market during good weather conditions, what is the maximum distance that well fed, fit cattle can be driven in one day?</p> <ul style="list-style-type: none"> <li>• 5 km</li> <li>• 10 km</li> <li>• 15 km</li> <li>• <b>30 km</b></li> <li>• 50 km</li> </ul>                                                                                         | 10.9 | 46.4 | +35.5 |
| Q17 | <p>Which of the following is not a method used for stunning animals prior to slaughter?</p> <ul style="list-style-type: none"> <li>• <b>hitting against a solid wall for piglets</b></li> <li>• captive bolt for cattle</li> <li>• electrical tongs for sheep and pigs</li> <li>• electrified water bath for chickens</li> <li>• gas stunning by carbon dioxide for chickens and pigs</li> </ul> | 39.5 | 65.6 | +26.1 |
| Q18 | <p>Approximately what output in chickens per hour can a typical modern chicken slaughter and processing facility produce?</p> <ul style="list-style-type: none"> <li>• 100 birds</li> <li>• 500 birds</li> <li>• <b>4000 birds</b></li> <li>• 8000 birds</li> <li>• 15000 birds</li> </ul>                                                                                                       | 30.4 | 52.2 | +21.8 |

## Section 2. Attitudes towards livestock management, with special emphasis on transport and slaughter

### Part A

**‘The welfare of animals’** means how an *animal* is coping with the conditions in which it lives. An *animal* is in a good state of *welfare* if (as indicated by scientific evidence) it is healthy, comfortable, well nourished, safe, able to express innate behaviour and is not suffering from unpleasant states such as pain, fear and distress (World Organisation for Animal Health -OIE).

**‘Community’** refers to a social group of any size whose members reside in a specific locality, share government, and often have a common cultural and historical heritage.

|                                                                                                                                  | Strongly Disagree | Disagree | Neither Disagree or Agree | Agree | Strongly Agree |
|----------------------------------------------------------------------------------------------------------------------------------|-------------------|----------|---------------------------|-------|----------------|
| 1. The welfare of the animals during slaughter is important to me                                                                |                   |          |                           |       |                |
| 2. The welfare of the animals during transport is important to me                                                                |                   |          |                           |       |                |
| 3. The welfare of the animals while being slaughtered is satisfactory in my workplace                                            |                   |          |                           |       |                |
| 4. The welfare of the animals while being transported is satisfactory in my workplace                                            |                   |          |                           |       |                |
| 5. Most people who are important to me would approve of me making improvements to the welfare of the animals in my care          |                   |          |                           |       |                |
| 6. I intend to make improvements to the welfare of the animals in my care                                                        |                   |          |                           |       |                |
| 7. I am confident that I can make improvements to the welfare of animals                                                         |                   |          |                           |       |                |
| 8. In the past I have tried to make improvements to the welfare of the animals in my care                                        |                   |          |                           |       |                |
| 9. The following factors influence <b>my personal</b> assessment of the welfare of the animals during slaughter and transport;   |                   |          |                           |       |                |
| 9a. My religious beliefs                                                                                                         |                   |          |                           |       |                |
| 9b. My personal beliefs (not religious)                                                                                          |                   |          |                           |       |                |
| 9c. The extent to which there are more pressing concerns than the welfare of animals in my community                             |                   |          |                           |       |                |
| 9d. My monetary gain                                                                                                             |                   |          |                           |       |                |
| 9e. Monetary gain to my community                                                                                                |                   |          |                           |       |                |
| 9f. How important the welfare of animals is to the company I work for                                                            |                   |          |                           |       |                |
| 9g. How important it is to my peers                                                                                              |                   |          |                           |       |                |
| 9h. My knowledge about animal slaughter and animal transportation practices                                                      |                   |          |                           |       |                |
| 9i. The laws relevant to animal slaughter and animals transportation practices                                                   |                   |          |                           |       |                |
| 10. The following factors influence <b>my communities’</b> assessment of animal welfare standards during slaughter and transport |                   |          |                           |       |                |
| 10a. Religious beliefs                                                                                                           |                   |          |                           |       |                |
| 10b. Personal beliefs (not religious)                                                                                            |                   |          |                           |       |                |
| 10c. The extent to which there are more pressing issues than the welfare of animals in their community                           |                   |          |                           |       |                |
| 10d. Monetary gain for themselves                                                                                                |                   |          |                           |       |                |
| 10e. Monetary gain to the company they work for                                                                                  |                   |          |                           |       |                |
| 10f. How important the welfare of animals is to the company they work for                                                        |                   |          |                           |       |                |

|                                                                                                                                             |  |  |  |  |  |
|---------------------------------------------------------------------------------------------------------------------------------------------|--|--|--|--|--|
| 10g. Their knowledge about animal slaughter and transportation practices                                                                    |  |  |  |  |  |
| 10h. The government laws and monitoring relevant to animal slaughter and transportation practices                                           |  |  |  |  |  |
| <b>11. The main factors that influence my ability to make improvements to animal welfare during <b>slaughter</b> include the following;</b> |  |  |  |  |  |
| 11a. My religious beliefs                                                                                                                   |  |  |  |  |  |
| 11b. My personal beliefs (not religious)                                                                                                    |  |  |  |  |  |
| 11c. The extent to which there are more pressing concerns than the welfare of animals in my community                                       |  |  |  |  |  |
| 11d. Monetary gain to myself                                                                                                                |  |  |  |  |  |
| 11e. Monetary gain to my community                                                                                                          |  |  |  |  |  |
| 11f. How important the welfare of animals is to the company I work for                                                                      |  |  |  |  |  |
| 11g. How important the welfare of animals is to my peers                                                                                    |  |  |  |  |  |
| 11h. Company approval towards improving the welfare of animals                                                                              |  |  |  |  |  |
| 11i. My knowledge about animal slaughter and animal transportation practices                                                                |  |  |  |  |  |
| 11j. My work space                                                                                                                          |  |  |  |  |  |
| 11k. The availability of tools and resources                                                                                                |  |  |  |  |  |
| 11l. The government laws and monitoring relevant to animal slaughter and transportation practices                                           |  |  |  |  |  |
| <b>12. The main factors that influence my ability to make improvements to animal welfare during <b>transport</b> include the following;</b> |  |  |  |  |  |
| 12a. My religious beliefs                                                                                                                   |  |  |  |  |  |
| 12b. My personal beliefs (not religious)                                                                                                    |  |  |  |  |  |
| 12c. The extent to which there are more pressing concerns than the welfare of animals in my community                                       |  |  |  |  |  |
| 12d. Monetary gain to myself                                                                                                                |  |  |  |  |  |
| 12e. Monetary gain to my community                                                                                                          |  |  |  |  |  |
| 12f. How important the welfare of the animals is to the company I work for                                                                  |  |  |  |  |  |
| 12g. How important the welfare of the animals is to my peers                                                                                |  |  |  |  |  |
| 12h. Company approval towards improving the welfare of animals                                                                              |  |  |  |  |  |
| 12i. My knowledge about animal slaughter and animal transportation practices                                                                |  |  |  |  |  |
| 12j. My work space                                                                                                                          |  |  |  |  |  |
| 12k. The vehicles I use are designed in way that makes it very hard to make improvements                                                    |  |  |  |  |  |
| 12l. The availability of tools and resources                                                                                                |  |  |  |  |  |
| 12m. The government laws and monitoring relevant to animal slaughter and animal transportation practices                                    |  |  |  |  |  |
| <b>13. I am more encouraged to change my practices if;</b>                                                                                  |  |  |  |  |  |
| 13a. Changes are prescribed by local government                                                                                             |  |  |  |  |  |
| 13b. Changes are prescribed by a local organization                                                                                         |  |  |  |  |  |
| 13c. Changes are prescribed by local law enforcement (police)                                                                               |  |  |  |  |  |
| 13d. Changes are prescribed by a western international organization                                                                         |  |  |  |  |  |
| 13e. Changes are prescribed by law                                                                                                          |  |  |  |  |  |
| 13f. Changes are prescribed by my company                                                                                                   |  |  |  |  |  |
| 13g. Changes are prescribed by my supervisor                                                                                                |  |  |  |  |  |
| 13h. Changes are prescribed by my community elder or community leader                                                                       |  |  |  |  |  |
| 13i. I see moral value in changing practices                                                                                                |  |  |  |  |  |
| 13j. I see personal monetary gain from changing practices                                                                                   |  |  |  |  |  |
| 13k. I see others making the changes                                                                                                        |  |  |  |  |  |

### Section 3: Demographic Background

**1. Please indicate your gender;**

- a. Male..... ☐
- b. Female..... ☐
- c. Transgender..... ☐

**2. In what type of area have you lived for most of your life?**

- a. Rural..... ☐
- b. Urban..... ☐
- c. Metropolitan..... ☐

**3. Are you happy to tell me your marital status?**

- a. Single, no children..... ☐
- b. Single, children..... ☐
- c. Married/De Facto, no children..... ☐
- d. Married/De Facto, children..... ☐
- e. Widowed..... ☐

**4. Please indicate your age range;**

- a. Under 18..... ☐
- b. 18–25..... ☐
- c. 26–35..... ☐
- d. 36–45..... ☐
- e. 46–55..... ☐
- f. 56–65..... ☐
- g. Over 65..... ☐

**5. Which religion do you follow?**

- a. Bahai' Faith..... ☐
- b. Buddhism..... ☐
- c. Caodaism..... ☐
- d. Chinese folk religion..... ☐
- e. Chondogyo..... ☐
- f. Christianity..... ☐
- g. Confuciansim..... ☐
- h. Hinduism..... ☐
- i. Islam..... ☐
- j. Jainism..... ☐
- k. Judaism..... ☐
- l. Shinto..... ☐

- m. Sikhism..... ☐
- n. Taoism..... ☐
- o. I don't follow a religion..... ☐
- p. Other (please specify) \_\_\_\_\_ ☐

**6. To what extent do you consider yourself religious?**

- a. Not religious at all..... ☐
- b. Not very religious..... ☐
- c. Moderately religious..... ☐
- d. Very religious..... ☐

**7. What region of your country do you belong to?**

**Malaysia –**

- a. West..... ☐
- b. East (Sabah and Sarawak)..... ☐

**China –**

- a. South..... ☐
- b. Central..... ☐
- c. North..... ☐
- d. East..... ☐
- e. Northeast..... ☐
- f. Northwest..... ☐
- g. Southwest..... ☐
- h. Hong Kong Macao area..... ☐

**Thailand –**

- a. North (Upper)..... ☐
- b. North (Lower)..... ☐
- c. Northeast (Eastern)..... ☐
- d. Northeast (Upper)..... ☐
- e. Northeast (Lower)..... ☐
- f. Central..... ☐
- g. East..... ☐
- h. West..... ☐
- i. South (Upper) ..... ☐
- j. South (Lower)..... ☐

**Vietnam –**

- a. North..... ☐
- b. South..... ☐
- c. Central (including Highland)..... ☐
- 8. Please indicate which job role best describes your involvement in the animal transport and slaughter industries**
- a. Work directly with the animals..... ☐
- b. Team Leader: Supervise people who work directly with the animals... ☐
- c. Business owner..... ☐
- d. Business Manager..... ☐
- e. Farmer..... ☐
- f. Veterinarian who treats animals hands on..... ☐
- g. Veterinarian working for the Government as an advisor..... ☐
- 9. Please indicate the type of livestock industry you are involved with**
- a. Beef cattle and buffalo production..... ☐
- b. Dairy industry (cattle/sheep/goat/buffalo). .... ☐
- c. Abattoirs/meatworks..... ☐
- d. Sheep and goat meat production..... ☐
- e. Sheep wool and goat hair Production..... ☐
- f. Poultry Industry (Broiler / Egg / Feed / Breeding / Hatchery) ..... ☐
- g. Meat processing..... ☐
- h. Pig Production..... ☐
- 10. Please indicate your level of understanding of livestock production systems**
- a. Expert..... ☐
- b. Good knowledge..... ☐
- c. Some knowledge..... ☐
- d. Little knowledge..... ☐
- e. No knowledge ..... ☐
- 12 How did you gain your knowledge?**
- a. Formal qualifications—relevant degree, training course..... ☐
- b. Farm employment—hands on experience..... ☐
- c. Personal interest—internet, journals, newspaper articles, and television programmes...☐
- d. Friends and acquaintances..... ☐
- e. All of the above..... ☐
- 2. Please indicate how long you have been working in the industry.**
- a. Less than 1 year..... ☐
- b. 2–3 Years..... ☐
- c. 3–5 Years..... ☐
- d. 5–9 Years..... ☐

- e. 10–15 Years..... ☐
- f. More than 15 Years..... ☐

Please feel free to contact Professor Clive Phillips, [c.phillips@uq.edu.au](mailto:c.phillips@uq.edu.au), **Centre for Animal Welfare and Ethics, School of Veterinary Science, University of Queensland, Gatton 4343, QLD, Australia, Tel. +61 7 5460 1158; mobile 0406340133**, if you have any questions or wish to comment on this survey.

**Thank you for taking the time to complete this questionnaire, your opinions are greatly valued.**
